# Supplementary material for: Association between Development Assistance for Health and Disease Burden: A Longitudinal Analysis on Official Development Assistance for HIV/AIDS, Tuberculosis, and Malaria in 2005–2017
Source: MDPI journal article supplement (doi:10.3390/ijerph192114091), 2022-10-28
Supplement: s1 [file s1]

## Supplementary material

### Association between development assistance for health and disease burden: a longitudinal analysis on official development assistance for HIV/AIDS, tuberculosis and malaria in 2005-2017

**Supp. Table S1. Sources of data included in main regression analysis.**

| Variable                                              | Source                                      |
|-------------------------------------------------------|---------------------------------------------|
| Development Assistance for Health by targeted disease | Institute for Health Metrics and Evaluation |
| HIV/AIDs, TB, Malaria DALY                            | Institute for Health Metrics and Evaluation |
| HIV/AIDs, TB, Malaria Incidence                       | World Health Organization                   |
| HIV/AIDs, TB, Malaria Death                           | Institute for Health Metrics and Evaluation |
| HIV/AIDs, TB, Malaria Infectious                      | World Health Organization                   |
| Population                                            | World Bank Development Indicator            |

**Supp. Table S2. Countries eligible for inclusion and utilized in each regression analysis.**

| HIV/AIDs (country code) | TB (country code) | Malaria (country code) |
|-------------------------|-------------------|------------------------|
| Afghanistan (AF)        | Afghanistan (AF)  |                        |
|                         | Albania (AL)      |                        |
|                         |                   | Algeria(DZ)            |
| Angola (AO)             | Angola(AO)        | Angola(AO)             |
| Armenia (AM)            | Armenia(AM)       |                        |

|                                   |                                   |                                   |
|-----------------------------------|-----------------------------------|-----------------------------------|
|                                   | Azerbaijan(AZ)                    |                                   |
|                                   |                                   | Argentina(AR)                     |
| Bangladesh (BD)                   | Bangladesh(BD)                    | Bangladesh(BD)                    |
| Belarus (BY)                      | Belarus(BY)                       |                                   |
| Benin (BJ)                        |                                   | Benin(BJ)                         |
| Bolivia (BO)                      | Bolivia(BO)                       | Bolivia(BO)                       |
| Bosnia and Herzegovina (BA)       |                                   |                                   |
| Botswana (BW)                     | Botswana(BW)                      | Botswana(BW)                      |
| Brazil (BR)                       | Brazil(BR)                        | Brazil(BR)                        |
| Burkina Faso (BF)                 | Burkina Faso(BF)                  | Burkina Faso(BF)                  |
|                                   |                                   |                                   |
| Burundi (BI)                      | Burundi(BI)                       | Burundi(BI)                       |
| Cambodia (KH)                     | Cambodia(KH)                      | Cambodia(KH)                      |
| Cameroon (CM)                     | Cameroon(CM)                      | Cameroon(CM)                      |
| Central African Republic (CF)     |                                   | Central African Republic(CF)      |
| Chad (TD)                         |                                   | Chad(TD)                          |
| China (People's Republic of) (CN) | China (People's Republic of) (CN) | China (People's Republic of) (CN) |

|                                       |                                      |                                            |
|---------------------------------------|--------------------------------------|--------------------------------------------|
| Colombia (CO)                         |                                      | Colombia(CO)                               |
| Congo (CG)                            |                                      | Congo(CG)                                  |
| Costa Rica (CR)                       |                                      |                                            |
| Cote d'Ivoire (CI)                    | Cote d'Ivoire(CI)                    | Cote d'Ivoire(CI)                          |
| Cuba (CU)                             |                                      |                                            |
|                                       |                                      | Democratic People's Republic of Korea (KP) |
| Democratic Republic of the Congo (CD) | Democratic Republic of the Congo(CD) | Democratic Republic of the Congo(CD)       |
| Djibouti (GI)                         | Djibouti(GI)                         |                                            |
| Dominica (DM)                         |                                      |                                            |
| Dominican Republic (DO)               | Dominican Republic(DO)               | Dominican Republic(DO)                     |
| Ecuador (EC)                          | Ecuador(EC)                          |                                            |
| Egypt (EG)                            | Egypt(EG)                            |                                            |
| El Salvador (SV)                      |                                      |                                            |
|                                       |                                      | Equatorial Guinea(GQ)                      |
| Eritrea (ER)                          | Eritrea(ER)                          | Eritrea(ER)                                |
| Ethiopia (ET)                         | Ethiopia(ET)                         | Ethiopia(ET)                               |

|                    |                   |                   |
|--------------------|-------------------|-------------------|
| Fiji (FJ)          | Fiji(FJ)          |                   |
|                    | Gabon(GA)         | Gabon(GA)         |
|                    | Gambia(GM)        |                   |
| Georgia (GE)       | Georgia(GE)       |                   |
| Ghana (GH)         | Ghana(GH)         | Ghana(GH)         |
| Guatemala (GT)     |                   | Guatemala(GT)     |
| Guinea (GN)        | Guinea(GN)        | Guinea(GN)        |
| Guinea-Bissau (GW) | Guinea-Bissau(GW) | Guinea-Bissau(GW) |
| Guyana (GY)        |                   |                   |
| Haiti (HT)         | Haiti(HT)         | Haiti(HT)         |
| Honduras (HN)      | Honduras(HN)      |                   |
| India (IN)         | India(IN)         | India(IN)         |
| Indonesia (ID)     | Indonesia(ID)     | Indonesia(ID)     |
|                    |                   | Iran(IR)          |
| Iraq (IQ)          | Iraq(IQ)          |                   |
|                    | Jordan(JO)        |                   |

|                 |                      |                |
|-----------------|----------------------|----------------|
| Jamaica (JM)    |                      |                |
|                 | Kazakhstan(KZ)       |                |
| Kenya (KE)      | Kenya(KE)            | Kenya(KE)      |
| Kiribati (KI)   | Kiribati(KI)         |                |
| Kyrgyzstan (KG) | Kyrgyzstan(KG)       |                |
| Lebanon (LB)    |                      |                |
| Lesotho (LS)    | Lesotho(LS)          |                |
| Liberia (LR)    | Liberia(LR)          | Liberia(LR)    |
| Libya (LY)      | Libya(LY)            |                |
| Madagascar (MG) | Madagascar(MG)       | Madagascar(MG) |
| Malawi (MW)     | Malawi(MW)           | Malawi(MW)     |
| Malaysia (MY)   | Malaysia(MY)         | Malaysia(MY)   |
| Mali (ML)       |                      | Mali(ML)       |
|                 | Marshall Islands(MH) |                |
|                 | Mauritania(MR)       | Mauritania(MR) |
|                 | Mexico(MX)           |                |

|                       |                      |                      |
|-----------------------|----------------------|----------------------|
| Mauritius (MU)        |                      |                      |
| Mongolia (MN)         | Mongolia(MN)         |                      |
|                       | Montenegro(ME)       |                      |
|                       | Morocco(MA)          |                      |
| Mozambique (MZ)       | Mozambique(MZ)       | Mozambique(MZ)       |
| Myanmar (MM)          | Myanmar(MM)          | Myanmar(MM)          |
| Namibia (NA)          | Namibia(NA)          |                      |
| Nepal (NP)            | Nepal(NP)            | Nepal(NP)            |
| Nicaragua (NI)        | Nicaragua(NI)        |                      |
| Niger (NE)            | Niger(NE)            | Niger(NE)            |
| Nigeria (NG)          | Nigeria(NG)          | Nigeria(NG)          |
| Pakistan (PK)         | Pakistan(PK)         |                      |
| Papua New Guinea (PG) | Papua New Guinea(PG) | Papua New Guinea(PG) |
|                       | Paraguay(PY)         |                      |
| Peru (PE)             | Peru(PE)             | Peru(PE)             |
| Philippines (PH)      | Philippines(PH)      | Philippines(PH)      |

|                                       |                           |                           |
|---------------------------------------|---------------------------|---------------------------|
| Rwanda (RW)                           | Rwanda(RW)                | Rwanda(RW)                |
| Saint Vincent and the Grenadines (VC) |                           |                           |
|                                       | Sao Tome and Principe(ST) | Sao Tome and Principe(ST) |
| Senegal (SN)                          | Senegal(SN)               | Senegal(SN)               |
| Serbia (RS)                           | Serbia(RS)                |                           |
| Sierra Leone (SL)                     | Sierra Leone(SL)          | Sierra Leone(SL)          |
|                                       | Solomon Islands(SB)       | Solomon Islands(SB)       |
| Somalia (SO)                          | Somalia(SO)               | Somalia(SO)               |
| South Africa (ZA)                     | South Africa(ZA)          | South Africa(ZA)          |
| Sri Lanka (LK)                        |                           | Sri Lanka(LK)             |
|                                       | South Sudan(SS)           | South Sudan(SS)           |
| Sudan (SD)                            | Sudan(SD)                 | Sudan(SD)                 |
| Suriname (SR)                         |                           |                           |
| Tanzania (TZ)                         |                           | Tanzania(TZ)              |
|                                       | Tajikistan(TJ)            |                           |
| Thailand (TH)                         | Thailand(TH)              | Thailand(TH)              |

|                   |                  |                 |
|-------------------|------------------|-----------------|
| Timor-Leste (TL)  | Timor-Leste(TL)  | Timor-Leste(TL) |
| Togo (TG)         |                  | Togo(TG)        |
| Tonga (TO)        |                  |                 |
|                   | Tunisia(TN)      |                 |
|                   | Turkey(TR)       |                 |
| Turkmenistan (TM) | Turkmenistan(TM) |                 |
| Uganda (UG)       | Uganda(UG)       | Uganda(UG)      |
| Ukraine (UA)      | Ukraine(UA)      |                 |
| Uzbekistan (UZ)   | Uzbekistan(UZ)   |                 |
| Vanuatu (VU)      |                  | Vanuatu(VU)     |
|                   |                  | Venezuela(VE)   |
| Viet Nam (VN)     | Viet Nam(VN)     | Viet Nam(VN)    |
| Yemen (YE)        | Yemen(YE)        |                 |
| Zambia (ZM)       | Zambia(ZM)       | Zambia(ZM)      |
| Zimbabwe (ZW)     | Zimbabwe(ZW)     | Zimbabwe(ZW)    |



**Supp. Table S3. Descriptive statistics for HIV/AIDS panel sample of 92 countries, 2005-2017**

| Variable                  | Obs  | Mean      | Std. Dev. | Min    | Max       |
|---------------------------|------|-----------|-----------|--------|-----------|
| Total DAH                 | 1196 | 49507.174 | 95426.763 | 0      | 611053    |
| GNI per capita            | 1165 | 2810.318  | 2551.531  | 140    | 12790     |
| DAH per capita            | 1196 | 3.524     | 7.534     | 0      | 93        |
| DALY                      | 1183 | 890437.23 | 2195938.3 | 29.701 | 17128947  |
| Number of infected people | 1196 | 317025.64 | 780096.09 | 6.768  | 6683339.8 |
| Number of deaths          | 1196 | 15675.084 | 39580.247 | 0      | 320241.44 |
| Prevalence                | 1183 | .015      | .029      | 0      | .165      |
| Incidence                 | 1183 | 1.651     | 3.462     | 0      | 24.1      |
| Mortality                 | 1183 | 69.856    | 132.589   | 0      | 852.686   |

**Supp. Table S3.1. Descriptive statistics for log(HIV/AIDS) panel sample of 92 countries, 2005-2017**

| Variable                        | Obs  | Mean   | Std. Dev. | Min   | Max    |
|---------------------------------|------|--------|-----------|-------|--------|
| log(Total DAH)                  | 1196 | 9.119  | 2.235     | 0     | 13.323 |
| log (GNI per capita)            | 1165 | 7.491  | 1.004     | 4.949 | 9.456  |
| log (DAH per capita)            | 1196 | .949   | .927      | 0     | 4.543  |
| log (DALY)                      | 1183 | 11.266 | 2.841     | 3.424 | 16.656 |
| log (Number of infected people) | 1196 | 10.309 | 2.832     | 2.05  | 15.715 |

|                        |      |       |       |   |        |
|------------------------|------|-------|-------|---|--------|
| log (Number of deaths) | 1196 | 7.277 | 2.756 | 0 | 12.677 |
| log (Prevalence)       | 1183 | .014  | .028  | 0 | .152   |
| log (Incidence)        | 1183 | .607  | .712  | 0 | 3.223  |
| log (Mortality)        | 1183 | 2.879 | 1.758 | 0 | 6.75   |

**Supp Table S4. Descriptive statistics for Tuberculosis panel sample of 87 countries, 2005-2017**

| Variable                  | Obs  | Mean      | Std. Dev. | Min     | Max       |
|---------------------------|------|-----------|-----------|---------|-----------|
| Total DAH                 | 1131 | 7291.736  | 13734.495 | 0       | 186890.56 |
| GNI per capita            | 1093 | 2816.697  | 2657.668  | 140     | 12790     |
| DAH per capita            | 1131 | .474      | .851      | 0       | 11.652    |
| DALY                      | 1131 | 550525.43 | 2025266.7 | 143.216 | 20432780  |
| Number of infected people | 1131 | 83027.692 | 307689.22 | 0       | 2901993.5 |
| Number of deaths          | 1131 | 13402.016 | 53297.438 | 0       | 520807.32 |
| Prevalence                | 1131 | .002      | .002      | 0       | .008      |
| Incidence                 | 1131 | 221.266   | 207.561   | 0       | 1280      |
| Mortality                 | 1131 | 29.328    | 30.25     | 0       | 173.431   |

**Supp. Table S4.1. Descriptive statistics for log(Tuberculosis) panel sample of 87 countries, 2005-2017**

| Variable             | Obs  | Mean   | Std. Dev. | Min   | Max    |
|----------------------|------|--------|-----------|-------|--------|
| log(Total DAH)       | 1131 | 7.333  | 2.552     | 0     | 12.138 |
| log (GNI per capita) | 1093 | 7.491  | .995      | 4.949 | 9.456  |
| log (DAH per capita) | 1131 | .307   | .352      | 0     | 2.538  |
| log (DALY)           | 1131 | 11.203 | 2.257     | 4.971 | 16.833 |

|                                 |      |       |       |   |        |
|---------------------------------|------|-------|-------|---|--------|
| log (Number of infected people) | 1131 | 9.599 | 1.983 | 0 | 14.881 |
| log (Number of deaths)          | 1131 | 7.486 | 2.196 | 0 | 13.163 |
| log (Prevalence)                | 1131 | .002  | .002  | 0 | .008   |
| log (Incidence)                 | 1131 | 4.914 | 1.153 | 0 | 7.155  |
| log (Mortality)                 | 1131 | 2.857 | 1.162 | 0 | 5.162  |

**Supp. Table S5. Descriptive statistics for Malaria panel sample of 75 countries, 2005-2017**

| Variable                  | Obs | Mean      | Std. Dev. | Min | Max      |
|---------------------------|-----|-----------|-----------|-----|----------|
| Total DAH                 | 884 | 17743.958 | 29693.625 | 0   | 294178   |
| GNI per capita            | 844 | 2503.685  | 2838.043  | 140 | 14250    |
| DAH per capita            | 884 | 1.233     | 2.511     | 0   | 29.303   |
| DALY                      | 884 | 845043.84 | 2264558.9 | 0   | 19138730 |
| Number of infected people | 884 | 3389131.8 | 7933275.8 | 0   | 60694992 |
| Number of deaths          | 884 | 11226.931 | 28960.616 | 0   | 241186.1 |
| Prevalence                | 884 | .144      | .16       | 0   | .596     |
| Incidence                 | 874 | 148.51    | 164.734   | 0   | 613.79   |
| Mortality                 | 884 | 44.36     | 62.274    | 0   | 283.015  |

**Supp. Table S5.1. Descriptive statistics for log(Malaria) panel sample of 75 countries, 2005-2017**

| Variable       | Obs | Mean  | Std. Dev. | Min | Max    |
|----------------|-----|-------|-----------|-----|--------|
| log(Total DAH) | 884 | 8.134 | 2.572     | 0   | 12.592 |

|                                 |     |        |       |       |        |
|---------------------------------|-----|--------|-------|-------|--------|
| log (GNI per capita)            | 844 | 7.283  | 1.037 | 4.949 | 9.565  |
| log (DAH per capita)            | 884 | .552   | .609  | 0     | 3.411  |
| log (DALY)                      | 884 | 10.755 | 3.369 | 0     | 16.767 |
| log (Number of infected people) | 884 | 12.65  | 3.258 | 0     | 17.921 |
| log (Number of deaths)          | 884 | 6.457  | 3.35  | 0     | 12.393 |
| log (Prevalence)                | 884 | .126   | .134  | 0     | .468   |
| log (Incidence)                 | 874 | 3.642  | 2.134 | 0     | 6.421  |
| log (Mortality)                 | 884 | 2.349  | 1.978 | 0     | 5.649  |

**Supp. Table S6. DAH total amount and number of DALY people or number of cases by year (All countries)**

| HIV/AIDS |       |            |        |      | TB    |            |         |      | Malaria |            |         |      |
|----------|-------|------------|--------|------|-------|------------|---------|------|---------|------------|---------|------|
| year     | Coef. | 95%CI      | p      | R    | Coef. | 95%CI      | p-value | R    | Coef.   | 95%CI      | p-value | R    |
| 2005     | 0.47  | 0.36, 0.58 | <0.001 | 0.56 | 0.78  | 0.55, 1.01 | <0.001  | 0.49 | 0.31    | 0.13, 0.49 | 0.001   | 0.41 |
| 2006     | 0.52  | 0.41, 0.63 | <0.001 | 0.61 | 0.69  | 0.48, 0.91 | <0.001  | 0.47 | 0.26    | 0.06, 0.47 | 0.01    | 0.28 |
| 2007     | 0.54  | 0.44, 0.64 | <0.001 | 0.65 | 0.62  | 0.42, 0.83 | <0.001  | 0.40 | 0.25    | 0.08, 0.41 | <0.01   | 0.37 |
| 2008     | 0.48  | 0.38, 0.59 | <0.001 | 0.60 | 0.56  | 0.38, 0.75 | <0.001  | 0.41 | 0.25    | 0.08, 0.42 | <0.01   | 0.43 |
| 2009     | 0.48  | 0.37, 0.59 | <0.001 | 0.58 | 0.54  | 0.33, 0.76 | <0.001  | 0.34 | 0.33    | 0.12, 0.53 | <0.01   | 0.35 |
| 2010     | 0.51  | 0.39, 0.62 | <0.001 | 0.59 | 0.52  | 0.32, 0.73 | <0.001  | 0.35 | 0.33    | 0.16, 0.51 | <0.001  | 0.46 |
| 2011     | 0.56  | 0.45, 0.66 | <0.001 | 0.65 | 0.68  | 0.46, 0.90 | <0.001  | 0.36 | 0.39    | 0.18, 0.59 | <0.001  | 0.41 |
| 2012     | 0.56  | 0.46, 0.67 | <0.001 | 0.66 | 0.53  | 0.33, 0.74 | <0.001  | 0.36 | 0.44    | 0.21, 0.67 | <0.001  | 0.37 |
| 2013     | 0.58  | 0.46, 0.69 | <0.001 | 0.63 | 0.69  | 0.49, 0.89 | <0.001  | 0.47 | 0.23    | 0.07, 0.40 | <0.01   | 0.45 |
| 2014     | 0.63  | 0.51, 0.75 | <0.001 | 0.67 | 0.63  | 0.43, 0.82 | <0.001  | 0.45 | 0.31    | 0.14, 0.47 | <0.001  | 0.51 |
| 2015     | 0.63  | 0.50, 0.76 | <0.001 | 0.59 | 0.65  | 0.44, 0.86 | <0.001  | 0.45 | 0.42    | 0.24, 0.61 | <0.001  | 0.45 |
| 2016     | 0.71  | 0.57, 0.82 | <0.001 | 0.67 | 0.61  | 0.43, 0.78 | <0.001  | 0.48 | 0.37    | 0.19, 0.55 | <0.001  | 0.48 |

|             |      |            |        |      |      |            |        |      |      |            |        |      |
|-------------|------|------------|--------|------|------|------------|--------|------|------|------------|--------|------|
| <b>2017</b> | 0.78 | 0.66, 0.91 | <0.001 | 0.73 | 0.66 | 0.46, 0.86 | <0.001 | 0.46 | 0.37 | 0.18, 0.55 | <0.001 | 0.48 |
|-------------|------|------------|--------|------|------|------------|--------|------|------|------------|--------|------|

**Supp.Table S7. DAH total amount and number of infected people or number of cases by year (All countries)**

| <b>HIV/AIDS</b> |              |              |          |          | <b>TB</b>    |              |                |          | <b>Malaria</b> |              |                |          |
|-----------------|--------------|--------------|----------|----------|--------------|--------------|----------------|----------|----------------|--------------|----------------|----------|
| <b>year</b>     | <b>Coef.</b> | <b>95%CI</b> | <b>p</b> | <b>R</b> | <b>Coef.</b> | <b>95%CI</b> | <b>p-value</b> | <b>R</b> | <b>Coef.</b>   | <b>95%CI</b> | <b>p-value</b> | <b>R</b> |
| <b>2005</b>     | 0.51         | 0.40, 0.61   | <0.001   | 0.61     | 0.51         | 0.27, 0.76   | <0.001         | 0.34     | 0.28           | 0.13, 0.44   | <0.001         | 0.42     |
| <b>2006</b>     | 0.55         | 0.45, 0.64   | <0.001   | 0.65     | 0.71         | 0.46, 0.96   | <0.001         | 0.44     | 0.50           | 0.30, 0.707  | <0.001         | 0.43     |
| <b>2007</b>     | 0.57         | 0.47, 0.66   | <0.001   | 0.68     | 0.65         | 0.42, 0.89   | <0.001         | 0.37     | 0.45           | 0.30, 0.61   | <0.001         | 0.54     |
| <b>2008</b>     | 0.50         | 0.40, 0.60   | <0.001   | 0.63     | 0.60         | 0.40, 0.81   | <0.001         | 0.40     | 0.40           | 0.24, 0.57   | <0.001         | 0.53     |
| <b>2009</b>     | 0.49         | 0.39, 0.60   | <0.001   | 0.59     | 0.57         | 0.33, 0.81   | <0.001         | 0.32     | 0.54           | 0.35, 0.72   | <0.001         | 0.51     |
| <b>2010</b>     | 0.52         | 0.41, 0.63   | <0.001   | 0.62     | 0.53         | 0.30, 0.76   | <0.001         | 0.31     | 0.45           | 0.29, 0.61   | <0.001         | 0.56     |
| <b>2011</b>     | 0.57         | 0.47, 0.66   | <0.001   | 0.69     | 0.73         | 0.48, 0.98   | <0.001         | 0.34     | 0.46           | 0.27, 0.66   | <0.001         | 0.47     |
| <b>2012</b>     | 0.57         | 0.48, 0.66   | <0.001   | 0.69     | 0.54         | 0.30, 0.77   | <0.001         | 0.32     | 0.48           | 0.26, 0.69   | <0.001         | 0.41     |
| <b>2013</b>     | 0.59         | 0.48, 0.69   | <0.001   | 0.67     | 0.69         | 0.46, 0.93   | <0.001         | 0.41     | 0.34           | 0.19, 0.49   | <0.001         | 0.53     |
| <b>2014</b>     | 0.63         | 0.53, 0.73   | <0.001   | 0.71     | 0.66         | 0.44, 0.88   | <0.001         | 0.42     | 0.39           | 0.25, 0.53   | <0.001         | 0.59     |
| <b>2015</b>     | 0.63         | 0.52, 0.75   | <0.001   | 0.65     | 0.66         | 0.42, 0.90   | <0.001         | 0.41     | 0.48           | 0.31, 0.64   | <0.001         | 0.52     |
| <b>2016</b>     | 0.70         | 0.60, 0.80   | <0.001   | 0.74     | 0.65         | 0.45, 0.85   | <0.001         | 0.46     | 0.42           | 0.26, 0.58   | <0.001         | 0.55     |

|             |      |           |        |      |      |            |        |      |      |            |        |      |
|-------------|------|-----------|--------|------|------|------------|--------|------|------|------------|--------|------|
| <b>2017</b> | 0.78 | 0.68 0.88 | <0.001 | 0.79 | 0.67 | 0.44, 0.91 | <0.001 | 0.42 | 0.33 | 0.18, 0.49 | <0.001 | 0.49 |
|-------------|------|-----------|--------|------|------|------------|--------|------|------|------------|--------|------|

**Supp. Table S8. DAH total amount and number of deaths people or number of cases by year (All countries)**

| <b>HIV/AIDS</b> |              |              |          |          | <b>TB</b>    |              |                |          | <b>Malaria</b> |              |                |          |
|-----------------|--------------|--------------|----------|----------|--------------|--------------|----------------|----------|----------------|--------------|----------------|----------|
| <b>year</b>     | <b>Coef.</b> | <b>95%CI</b> | <b>p</b> | <b>R</b> | <b>Coef.</b> | <b>95%CI</b> | <b>p-value</b> | <b>R</b> | <b>Coef.</b>   | <b>95%CI</b> | <b>p-value</b> | <b>R</b> |
| <b>2005</b>     | 0.48         | 0.37, 0.61   | <0.001   | 0.56     | 0.58         | 0.34, 0.81   | <0.001         | 0.38     | 0.22           | 0.05, 0.38   | 0.009          | 0.36     |
| <b>2006</b>     | 0.53         | 0.43, 0.64   | <0.001   | 0.61     | 0.69         | 0.46, 0.91   | <0.001         | 0.46     | 0.24           | 0.04, 0.44   | 0.01           | 0.28     |
| <b>2007</b>     | 0.55         | 0.45, 0.66   | <0.001   | 0.63     | 0.62         | 0.40, 0.83   | <0.001         | 0.38     | 0.22           | 0.06, 0.38   | 0.006          | 0.37     |
| <b>2008</b>     | 0.50         | 0.39, 0.60   | <0.001   | 0.61     | 0.56         | 0.36, 0.75   | <0.001         | 0.39     | 0.23           | 0.07, 0.40   | 0.005          | 0.42     |
| <b>2009</b>     | 0.50         | 0.38, 0.61   | <0.001   | 0.57     | 0.52         | 0.30, 0.75   | <0.001         | 0.31     | 0.31           | 0.11, 0.50   | 0.002          | 0.34     |
| <b>2010</b>     | 0.52         | 0.40, 0.64   | <0.001   | 0.59     | 0.51         | 0.30, 0.73   | <0.001         | 0.33     | 0.30           | 0.12, 0.49   | 0.001          | 0.43     |
| <b>2011</b>     | 0.58         | 0.47, 0.68   | <0.001   | 0.65     | 0.68         | 0.44, 0.91   | <0.001         | 0.34     | 0.35           | 0.14, 0.56   | 0.002          | 0.39     |
| <b>2012</b>     | 0.59         | 0.48, 0.69   | <0.001   | 0.66     | 0.52         | 0.30, 0.73   | <0.001         | 0.34     | 0.43           | 0.19, 0.19   | 0.001          | 0.36     |
| <b>2013</b>     | 0.61         | 0.49, 0.72   | <0.001   | 0.63     | 0.68         | 0.47, 0.90   | <0.001         | 0.44     | 0.22           | 0.04, 0.39   | 0.01           | 0.44     |
| <b>2014</b>     | 0.66         | 0.54, 0.78   | <0.001   | 0.67     | 0.63         | 0.43, 0.84   | <0.001         | 0.44     | 0.27           | 0.10, 0.44   | 0.002          | 0.48     |
| <b>2015</b>     | 0.65         | 0.52, 0.79   | <0.001   | 0.59     | 0.64         | 0.42, 0.86   | <0.001         | 0.43     | 0.39           | 0.20, 0.58   | <0.001         | 0.41     |

|             |      |            |        |      |      |            |        |      |      |            |        |      |
|-------------|------|------------|--------|------|------|------------|--------|------|------|------------|--------|------|
| <b>2016</b> | 0.72 | 0.59, 0.85 | <0.001 | 0.67 | 0.62 | 0.44, 0.80 | <0.001 | 0.47 | 0.36 | 0.17, 0.55 | <0.001 | 0.46 |
| <b>2017</b> | 0.67 | 0.52, 0.81 | <0.001 | 0.61 | 0.66 | 0.45, 0.87 | <0.001 | 0.45 | 0.39 | 0.19, 0.61 | <0.001 | 0.47 |

**Supp. Table S9. DAH per capita amount and number of prevalence people or number of cases by year (All countries)**

| <b>HIV/AIDS</b> |              |              |          |          | <b>TB</b>    |                |                |          | <b>Malaria</b> |              |                |          |
|-----------------|--------------|--------------|----------|----------|--------------|----------------|----------------|----------|----------------|--------------|----------------|----------|
| <b>year</b>     | <b>Coef.</b> | <b>95%CI</b> | <b>p</b> | <b>R</b> | <b>Coef.</b> | <b>95%CI</b>   | <b>p-value</b> | <b>R</b> | <b>Coef.</b>   | <b>95%CI</b> | <b>p-value</b> | <b>R</b> |
| <b>2005</b>     | 16.22        | 11.93, 20.51 | <0.001   | 0.41     | 7.28         | -17.30, 31.88  | 0.55           | 0.05     | 0.77           | -0.01, 1.55  | 0.05           | 0.11     |
| <b>2006</b>     | 18.86        | 14.04, 23.68 | <0.001   | 0.42     | 57.44        | 4.92, 109.95   | 0.03           | 0.05     | 0.91           | -0.09, 1.92  | 0.07           | 0.05     |
| <b>2007</b>     | 21.83        | 17.05, 26.61 | <0.001   | 0.50     | 62.82        | 11.48, 114.17  | 0.01           | 0.06     | 0.48           | -0.25, 1.22  | 0.19           | 0.08     |
| <b>2008</b>     | 24.34        | 18.76, 29.92 | <0.001   | 0.48     | 60.79        | 16.50, 105.08  | <0.001         | 0.08     | 0.44           | -0.72, 1.62  | 0.44           | 0.11     |
| <b>2009</b>     | 24.54        | 19.14, 29.94 | <0.001   | 0.49     | 53.92        | -5.67, 113.53  | 0.07           | 0.03     | 0.84           | -0.50, 2.20  | 0.21           | 0.09     |
| <b>2010</b>     | 24.68        | 19.29, 30.07 | <0.001   | 0.50     | 27.59        | -36.20, 91.40  | 0.39           | 0.01     | 0.72           | -0.57, 2.02  | 0.27           | 0.20     |
| <b>2011</b>     | 24.91        | 19.67, 30.15 | <0.001   | 0.51     | 10.43        | -38.46, 59.32  | 0.67           | 0.002    | 0.78           | -0.28, 1.84  | 0.14           | 0.28     |
| <b>2012</b>     | 25.58        | 20.29, 30.87 | <0.001   | 0.53     | 59.15        | -15.67, 133.97 | 0.12           | 0.04     | 1.20           | -0.14, 2.55  | 0.07           | 0.15     |
| <b>2013</b>     | 24.35        | 19.28, 29.43 | <0.001   | 0.53     | 38.63        | -24.43, 101.71 | 0.22           | 0.05     | 0.36           | -1.02, 1.75  | 0.60           | 0.22     |
| <b>2014</b>     | 24.52        | 19.59, 29.45 | <0.001   | 0.56     | 47.76        | -7.51, 103.04  | 0.08           | 0.04     | 0.59           | -0.63, 1.82  | 0.33           | 0.25     |
| <b>2015</b>     | 22.92        | 18.51, 27.32 | <0.001   | 0.56     | 29.27        | -32.31, 90.85  | 0.34           | 0.05     | 0.77           | -0.281, 0.83 | 0.15           | 0.26     |

|             |       |              |        |      |        |                |        |      |      |              |      |      |
|-------------|-------|--------------|--------|------|--------|----------------|--------|------|------|--------------|------|------|
| <b>2016</b> | 24.24 | 20.14, 28.35 | <0.001 | 0.63 | 149.98 | 90.47, 209.49  | <0.001 | 0.24 | 0.88 | -0.452, 0.22 | 0.19 | 0.30 |
| <b>2017</b> | 24.34 | 20.07, 28.61 | <0.001 | 0.62 | 203.93 | 137.07, 270.79 | <0.001 | 0.33 | 0.84 | -0.48, 2.16  | 0.20 | 0.33 |

**Supp. Table S10. DAH per capita amount and number of incidence people or number of cases by year (All countries)**

| <b>HIV/AIDS</b> |              |              |          |          | <b>TB</b>    |              |                |          | <b>Malaria</b> |              |                |          |
|-----------------|--------------|--------------|----------|----------|--------------|--------------|----------------|----------|----------------|--------------|----------------|----------|
| <b>year</b>     | <b>Coef.</b> | <b>95%CI</b> | <b>p</b> | <b>R</b> | <b>Coef.</b> | <b>95%CI</b> | <b>p-value</b> | <b>R</b> | <b>Coef.</b>   | <b>95%CI</b> | <b>p-value</b> | <b>R</b> |
| <b>2005</b>     | 0.61         | 0.46, .76    | <0.001   | 0.44     | -0.01        | -0.03, 0.02  | 0.76           | 0.05     | 0.09           | 0.03, 0.15   | <0.01          | 0.18     |
| <b>2006</b>     | 0.71         | 0.53, .88    | <0.001   | 0.43     | 0.08         | 0.02, 0.15   | 0.01           | 0.08     | 0.12           | 0.04, 0.19   | <0.01          | 0.15     |
| <b>2007</b>     | 0.83         | 0.65, 1.00   | <0.001   | 0.52     | 0.07         | 0.01, 0.13   | 0.03           | 0.05     | 0.07           | 0.02, 0.13   | <0.01          | 0.18     |
| <b>2008</b>     | 0.87         | 0.66, 1.09   | <0.001   | 0.44     | 0.08         | 0.03, 0.13   | <0.01          | 0.11     | 0.10           | 0.02, 0.18   | 0.01           | 0.18     |
| <b>2009</b>     | 0.89         | 0.67, 1.10   | <0.001   | 0.45     | 0.09         | 0.02, 0.17   | <0.01          | 0.08     | 0.16           | 0.07, 0.25   | 0.001          | 0.23     |
| <b>2010</b>     | 0.95         | 0.75, 1.16   | <0.001   | 0.51     | 0.05         | -0.02, 0.12  | 0.20           | 0.02     | 0.13           | 0.04, 0.22   | <0.01          | 0.29     |
| <b>2011</b>     | 0.97         | 0.77, 1.18   | <0.001   | 0.52     | 0.03         | -0.03, 0.10  | 0.37           | 0.01     | 0.09           | 0.01, 0.16   | 0.01           | 0.31     |
| <b>2012</b>     | 1.00         | 0.78, 1.22   | <0.001   | 0.50     | 0.12         | 0.03, 0.21   | <0.01          | 0.09     | 0.12           | 0.03, 0.21   | <0.01          | 0.21     |
| <b>2013</b>     | 1.02         | 0.81, 1.22   | <0.001   | 0.54     | 0.10         | 0.02, 0.18   | 0.01           | 0.10     | 0.10           | 0.02, 0.19   | 0.01           | 0.29     |
| <b>2014</b>     | 1.03         | 0.82, 1.24   | <0.001   | 0.55     | 0.10         | 0.03, 0.17   | <0.01          | 0.11     | 0.07           | -0.002, 0.14 | 0.05           | 0.28     |



|             |      |            |        |      |      |             |        |      |      |            |       |      |
|-------------|------|------------|--------|------|------|-------------|--------|------|------|------------|-------|------|
| <b>2015</b> | 1.00 | 0.82, 1.19 | <0.001 | 0.57 | 0.09 | 0.016, 0.16 | 0.01   | 0.10 | 0.08 | 0.02, 0.14 | <0.01 | 0.32 |
| <b>2016</b> | 1.12 | 0.95, 1.29 | <0.001 | 0.68 | 0.18 | 0.10, 0.25  | <0.001 | 0.23 | 0.09 | 0.02, 0.16 | 0.01  | 0.35 |
| <b>2017</b> | 1.19 | 1.02, 1.37 | <0.001 | 0.69 | 0.21 | 0.12, 0.31  | <0.001 | 0.25 | 0.08 | 0.01, 0.15 | 0.02  | 0.37 |

**Supp. Table S11. DAH per capita amount and number of mortality people or number of cases by year (All countries)**

| <b>HIV/AIDS</b> |              |              |          |          | <b>TB</b>    |              |                |          | <b>Malaria</b> |              |                |          |
|-----------------|--------------|--------------|----------|----------|--------------|--------------|----------------|----------|----------------|--------------|----------------|----------|
| <b>year</b>     | <b>Coef.</b> | <b>95%CI</b> | <b>p</b> | <b>R</b> | <b>Coef.</b> | <b>95%CI</b> | <b>p-value</b> | <b>R</b> | <b>Coef.</b>   | <b>95%CI</b> | <b>p-value</b> | <b>R</b> |
| <b>2005</b>     | 0.25         | 0.19, 0.32   | <0.001   | 0.41     | 0.0008       | -0.03, 0.03  | 0.96           | 0.05     | 0.02           | -0.04, 0.08  | 0.52           | 0.05     |
| <b>2006</b>     | 0.31         | 0.23, 0.39   | <0.001   | 0.45     | 0.09         | 0.01, 0.17   | 0.01           | 0.07     | 0.03           | -0.04, 0.11  | 0.42           | 0.01     |
| <b>2007</b>     | 0.35         | 0.27, 0.43   | <0.001   | 0.50     | 0.07         | 0.0008, 0.15 | 0.04           | 0.04     | -0.0005        | -0.05, 0.05  | 0.98           | 0.06     |
| <b>2008</b>     | 0.38         | 0.28, 0.47   | <0.001   | 0.43     | 0.06         | -0.006, 0.12 | 0.07           | 0.03     | -0.01          | -0.10, 0.07  | 0.74           | 0.10     |
| <b>2009</b>     | 0.37         | 0.28, 0.46   | <0.001   | 0.43     | 0.05         | -0.03, 0.14  | 0.20           | 0.01     | 0.02           | -0.07, 0.13  | 0.57           | 0.07     |
| <b>2010</b>     | 0.39         | 0.30, 0.49   | <0.001   | 0.47     | 0.04         | -0.04, 0.14  | 0.34           | 0.01     | 0.01           | -0.08, 0.11  | 0.76           | 0.19     |
| <b>2011</b>     | 0.40         | 0.31, 0.50   | <0.001   | 0.47     | 0.005        | -0.06, 0.07  | 0.88           | 0.0004   | 0.03           | -0.04, 0.11  | 0.26           | 0.43     |
| <b>2012</b>     | 0.42         | 0.32, 0.52   | <0.001   | 0.45     | 0.08         | -0.01, 0.18  | 0.10           | 0.04     | 0.03           | -0.06, 0.14  | 0.44           | 0.12     |
| <b>2013</b>     | 0.44         | 0.35, 0.53   | <0.001   | 0.52     | 0.06         | -0.01, 0.15  | 0.11           | 0.06     | -0.01          | -0.11, 0.08  | 0.77           | 0.22     |

|             |      |            |        |      |      |             |        |      |      |             |      |      |
|-------------|------|------------|--------|------|------|-------------|--------|------|------|-------------|------|------|
| <b>2014</b> | 0.42 | 0.32, 0.52 | <0.001 | 0.48 | 0.05 | -0.01, 0.13 | 0.12   | 0.03 | 0.02 | -0.06, 0.11 | 0.64 | 0.24 |
| <b>2015</b> | 0.41 | 0.32, 0.50 | <0.001 | 0.49 | 0.06 | -0.01, 0.14 | 0.11   | 0.07 | 0.05 | -0.01, 0.13 | 0.14 | 0.26 |
| <b>2016</b> | 0.46 | 0.37, 0.55 | <0.001 | 0.59 | 0.15 | 0.07, 0.23  | <0.001 | 0.15 | 0.04 | -0.05, 0.13 | 0.41 | 0.29 |
| <b>2017</b> | 0.42 | 0.31, 0.52 | <0.001 | 0.46 | 0.19 | 0.11, 0.29  | <0.001 | 0.21 | 0.03 | -0.05, 0.12 | 0.45 | 0.32 |
